# Supplementary material for: EGFP-EGF1-conjugated poly (lactic-co-glycolic acid) nanoparticles as a carrier for the delivery of CCR2− shRNA to atherosclerotic macrophage in vitro
Source: PubMed Central journal article supplement (PMC7661524; doi:10.1038/s41598-020-76416-4), 2020-11-12
Supplement: 41598_2020_76416_MOESM1_ESM.pdf [file 41598_2020_76416_MOESM1_ESM.pdf]

CCR2

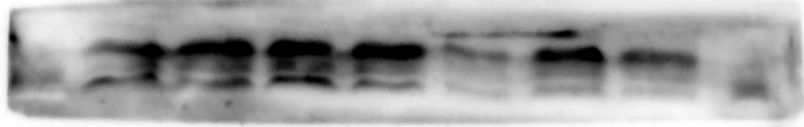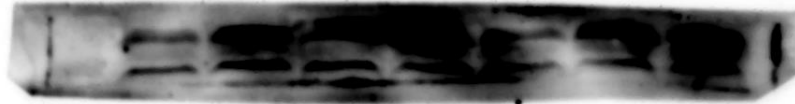

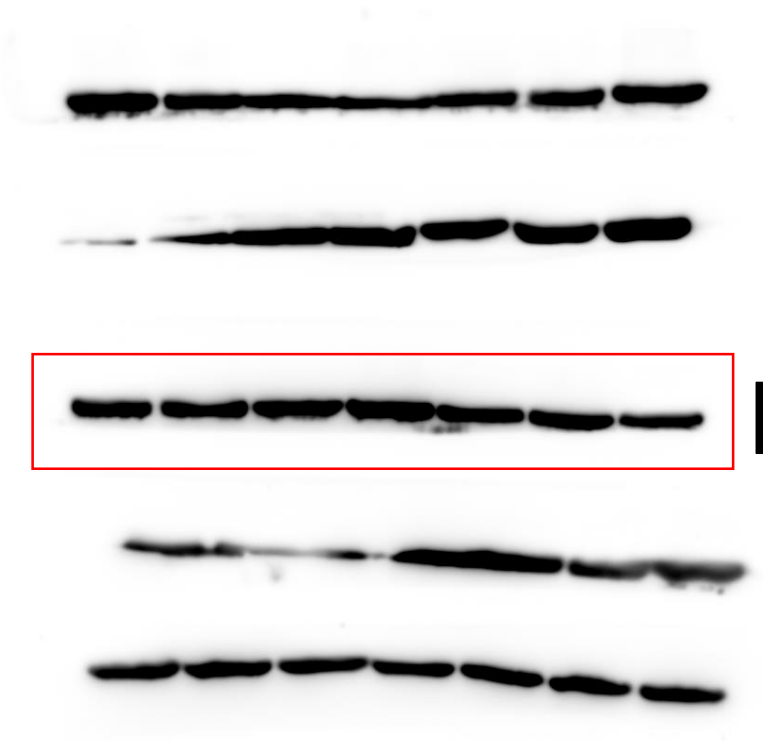

GAPDH

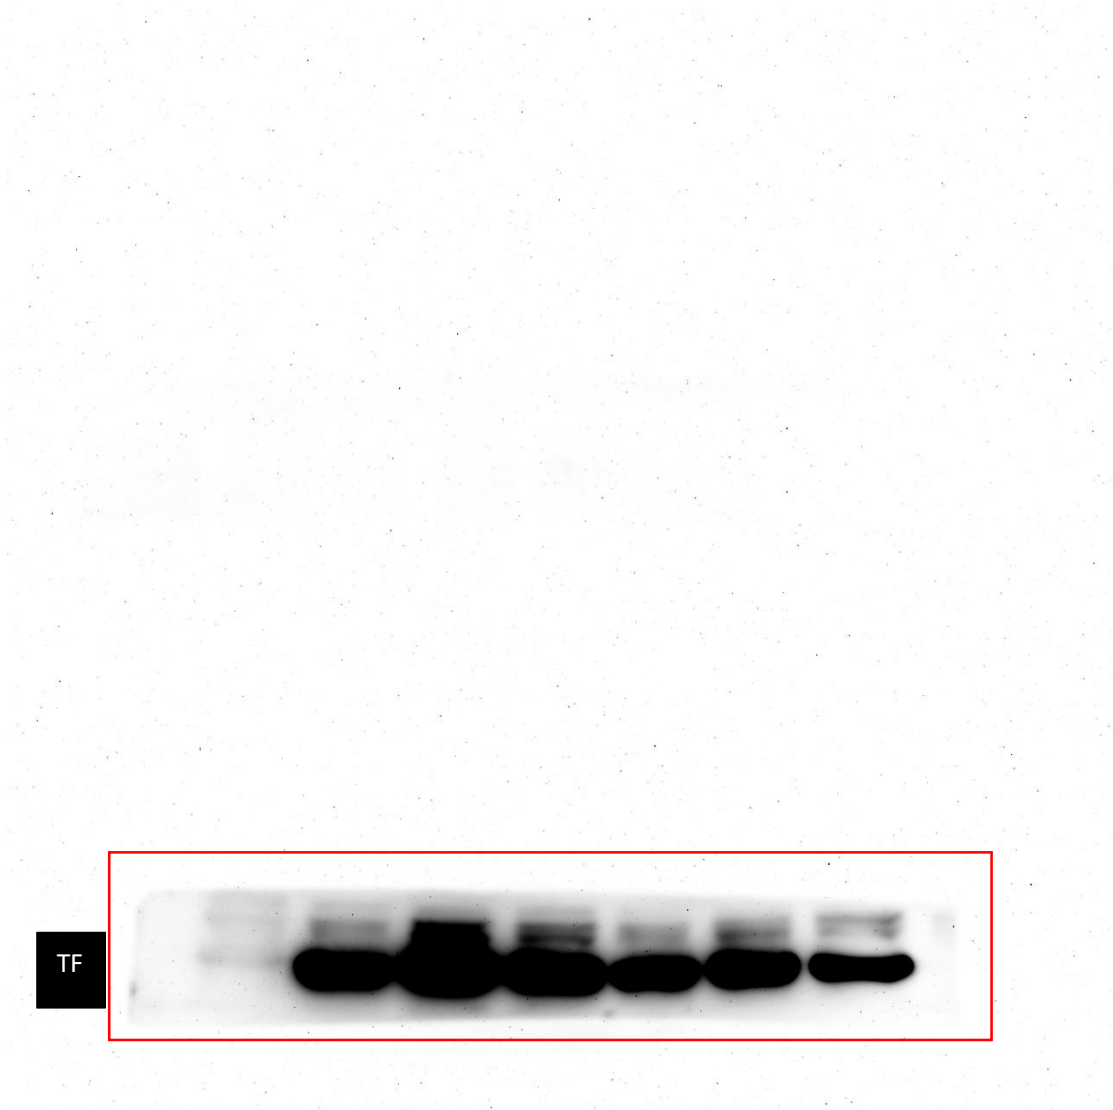

The above photos were original western-blot for CCR2, Tissue factor and GAPDH protein expressions. Heterozona coexists in the blot and was chopped to make the figures more beautiful.
